# Supplementary material
Source: PubMed Central journal article supplement (PMC8385562)
Supplement: NEJMc2108076_disclosures.pdf [file NEJMc2108076_disclosures.pdf]

Disclosure Purpose: 21-08076

Summary of Interests

I do not have any interests to disclose at this time.

Additional Questions:

- 1. **Are there other relationships or activities that readers could perceive to have influenced, or that give the appearance of potentially influencing, what you wrote in the submitted work?**  
No.
- 2. **What is the manuscript title?**  
Breakthrough Infections in BNT162b2 Vaccinated Health-Care Workers
- 3. **Are you the corresponding author?**  
No.

Certification

I certify that the information provided in this disclosure is complete and accurate.

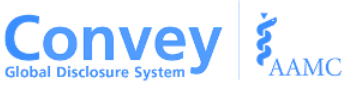

**Disclosure Purpose:** 21-08076

**Summary of Interests**

I do not have any interests to disclose at this time.

**Additional Questions:**

- 1. **Are there other relationships or activities that readers could perceive to have influenced, or that give the appearance of potentially influencing, what you wrote in the submitted work?**  
No.
- 2. **What is the manuscript title?**  
Breakthrough Infections in BNT162b2 Vaccinated Health-Care Workers
- 3. **Are you the corresponding author?**  
No.

**Certification**

I certify that the information provided in this disclosure is complete and accurate.

Disclosure Purpose: 21-08076

## Summary of Interests

I do not have any interests to disclose at this time.

## Additional Questions:

- Are there other relationships or activities that readers could perceive to have influenced, or that give the appearance of potentially influencing, what you wrote in the submitted work?**  
No.
- What is the manuscript title?**  
Breakthrough Infections in BNT162b2 Vaccinated Health-Care Workers
- Are you the corresponding author?**  
Yes.
  - Please list the other authors' names here.**  
Bettina Lange and Marlis Gerigk

## Certification

I certify that the information provided in this disclosure is complete and accurate.
